# Supplementary material for: Identification of Cellular Genes Targeted by KSHV-Encoded MicroRNAs
Source: PubMed Central journal article supplement (PMC1876501; doi:10.1371/journal.ppat.0030065), 2007-05-11

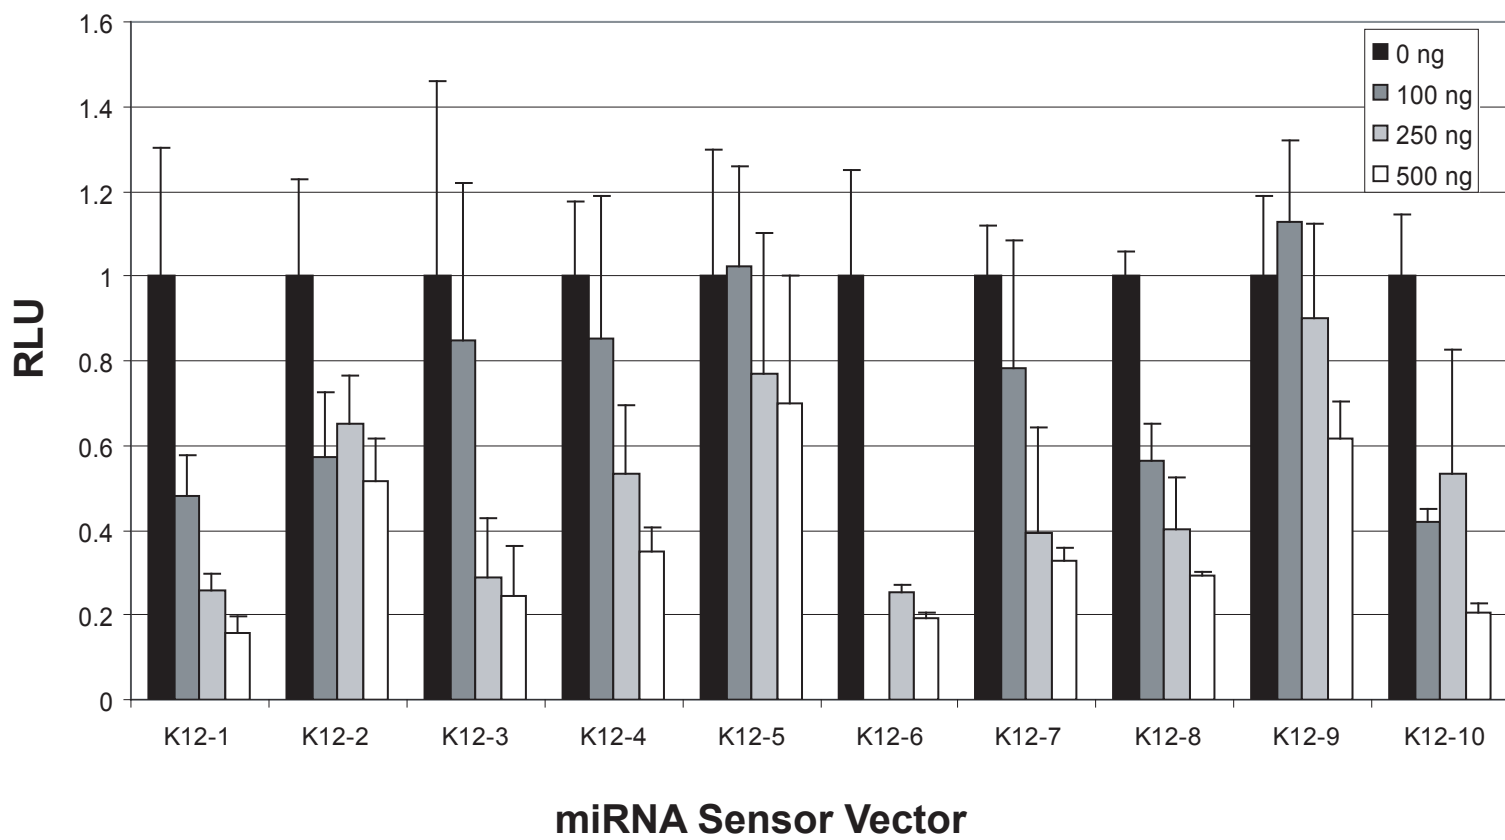

Supplement: ppat.0030065.sg001.pdf [file ppat.0030065.sg001.pdf]
